# Supplementary material for: Systematic Review of Behaviour Change Theories Implementation in Dietary Interventions for People Who Have Survived Cancer
Source: MDPI journal article supplement (doi:10.3390/nu13020612), 2021-02-13
Supplement: s1 [file s1]

**Table S1.** CENTRAL Search Strategy

|     |                                                                                                                                                                                                |
|-----|------------------------------------------------------------------------------------------------------------------------------------------------------------------------------------------------|
| #1  | MeSH descriptor: [Neoplasms] explode all trees                                                                                                                                                 |
| #2  | (cancer* or tumor* or tumour* or neoplas* or malignan* or carcinoma* or adenocarcinoma* or choriocarcinoma* or leukemia* or leukaemia* or metastat* or sarcoma* or teratoma*):ti,ab            |
| #3  | #1 or #2                                                                                                                                                                                       |
| #4  | MeSH descriptor: [Diet] explode all trees                                                                                                                                                      |
| #5  | MeSH descriptor: [Nutrition Assessment] explode all trees                                                                                                                                      |
| #6  | MeSH descriptor: [Nutrition Therapy] explode all trees                                                                                                                                         |
| #7  | MeSH descriptor: [Nutrition Disorders] explode all trees                                                                                                                                       |
| #8  | MeSH descriptor: [Food Habits] explode all trees                                                                                                                                               |
| #9  | MeSH descriptor: [Food Preferences] explode all trees                                                                                                                                          |
| #10 | MeSH descriptor: [Food] explode all trees                                                                                                                                                      |
| #11 | (diet* or nutrition* or nutrient* or food* or feed* or eat* or drink*):ti,ab                                                                                                                   |
| #12 | (fat* or carbohydrate* or protein* or fruit* or vegetable* or fibre* or fiber* or fish* or meat* or poultry or dairy or salt* or sugar* or cereal* or nut* or seed* or alcohol* or caGeine):ti |
| #13 | (macrobiotic or ketogenic or vegetarian or (low adj (glycemic* or glycaemic*))) :ti                                                                                                            |
| #14 | #5 or #6 or #7 or #8 or #9 or #10 or #11 or #12 or #13                                                                                                                                         |
| #15 | MeSH descriptor: [Survivors] explode all trees                                                                                                                                                 |
| #16 | (survivor* or survival*):ti,ab                                                                                                                                                                 |
| #17 | #15 or #16                                                                                                                                                                                     |
| #18 | #3 and #14 and #17                                                                                                                                                                             |
| #19 | Additional inclusion criterion on use of behaviour change theory was incorporated during the full text screening.                                                                              |

**Table S2.** GRADE PRO table for dietary outcomes.

| Outcomes                                 | Anticipated Absolute Effects* (95% CI)                            |                                                     | Number of Participants (Studies) | Certainty of the Evidence (GRADE) |
|------------------------------------------|-------------------------------------------------------------------|-----------------------------------------------------|----------------------------------|-----------------------------------|
|                                          | Risk with Usual Care                                              | Risk with Dietary Changes                           |                                  |                                   |
| Energy intake (kcal) at 6 months         | The mean energy intake (kcal) at 6 months was 1650.5 kcal         | MD 104.72 kcal lower (246.35 lower to 36.91 higher) | 3322 (4 RCTs)                    | ⊕⊕⊕○<br>MODERATE <sup>a</sup>     |
| Energy intake (kcal) at 12 months        | The mean energy intake (kcal) at 12 months was 1613 kcal          | MD 109.69 kcal lower (251.09 lower to 31.7 higher)  | 3245 (4 RCTs)                    | ⊕⊕⊕○<br>MODERATE <sup>a</sup>     |
| Fruit servings (per day) at 6 months     | The mean fruit servings (per day) at 6 months was 2.65 serving    | MD 0.62 serving higher (0.08 higher to 1.16 higher) | 3157 (2 RCTs)                    | ⊕⊕⊕○<br>MODERATE <sup>d</sup>     |
| Fruit servings (per day) at 12 months    | The mean fruit servings (per day) at 12 months was 2.67 serving   | MD 0.47 serving higher (0.13 lower to 1.07 higher)  | 3205 (3 RCTs)                    | ⊕⊕⊕○<br>MODERATE <sup>d</sup>     |
| Vegetable servings (per day) at 6 months | The mean vegetable servings (per day) at 6 months was 2.3 serving | MD 2.7 grams higher (0.93 lower to 6.32 higher)     | 3200 (3 RCTs)                    | ⊕⊕○○<br>LOW <sup>e</sup>          |

| Outcomes                                            | Anticipated Absolute Effects* (95% CI)                                       |                                                    | Number of Participants (Studies) | Certainty of the Evidence (GRADE) |
|-----------------------------------------------------|------------------------------------------------------------------------------|----------------------------------------------------|----------------------------------|-----------------------------------|
|                                                     | Risk with Usual Care                                                         | Risk with Dietary Changes                          |                                  |                                   |
| Vegetable servings (per day) at 12 months           | The mean vegetable servings (per day) at 12 months was 3.7 serving           | MD 2.15 grams higher (1.38 lower to 5.67 higher)   | 3147 (2 RCTs)                    | ⊕⊕○○ LOW <sup>e</sup>             |
| Fruit and vegetable servings (per day) at 6 months  | The mean fruit and vegetable servings (per day) at 6 months was 4.05 serving | MD 0.48 serving higher (0.06 lower to 1.02 higher) | 237 (2 RCTs)                     | ⊕⊕○○ LOW <sup>b,f</sup>           |
| Fruit and vegetable servings (per day) at 12 months | The mean fruit and vegetable servings (per day) at 12 months was 5.0 serving | MD 0.38 serving higher (0.03 lower to 0.78 higher) | 796 (4 RCTs)                     | ⊕⊕⊕○ MODERATE <sup>g</sup>        |
| Fibre intake at 6 months                            | The mean fibre intake at 6 months was 16.65 grams                            | MD 3.56 grams higher (8.48 lower to 15.61 higher)  | 3213 (2 RCTs)                    | ⊕⊕⊕○ MODERATE <sup>a</sup>        |
| Fibre intake at 12 months                           | The mean fibre intake at 12 months was 21.0 grams                            | MD 8 grams higher (7.3 higher to 8.7 higher)       | 3088 (1 RCT)                     | ⊕⊕⊕○ MODERATE <sup>c</sup>        |
| Diet Quality Index at 12 months                     | The mean diet Quality Index at 12 months was 64.7 score                      | MD 3.62 score higher (1.95 higher to 5.30 higher)  | 719 (3 RCTs)                     | ⊕⊕⊕○ MODERATE <sup>h</sup>        |

\*The risk in the intervention group (and its 95% confidence interval) is based on the assumed risk in the comparison group and the relative effect of the intervention (and its 95% CI). CI: Confidence interval; MD: Mean difference; SMD: Standardised mean difference. GRADE Working Group grades of evidence: High certainty: We are very confident that the true effect lies close to that of the estimate of the effect; Moderate certainty: We are moderately confident in the effect estimate: The true effect is likely to be close to the estimate of the effect, but there is a possibility that it is substantially different; Low certainty: Our confidence in the effect estimate is limited: The true effect may be substantially different from the estimate of the effect; Very low certainty: We have very little confidence in the effect estimate: The true effect is likely to be substantially different from the estimate of effect. Explanations: <sup>a</sup>. Downgraded due to wide variation in effect estimates across studies; <sup>b</sup>. Downgraded due to small study population; <sup>c</sup>. Downgraded one level as only one study is analysed; <sup>d</sup>. Downgraded one level due to inconsistency in studied population and design; <sup>e</sup>. Downgraded two levels due to large inconsistencies in studied population; <sup>f</sup>. Downgraded one level due to indirectness—primary aim of studies was not fruit and vegetable intake; <sup>g</sup>. Downgraded one level due to indirectness—primary aim of some studies was not fruit and vegetable intake; <sup>h</sup>. Downgraded one level due to risk of bias.

Table S3. GRADE PRO table for anthropometry outcomes.

| Outcomes                                          | Anticipated absolute effects* (95% CI)                                                |                                                           | No of participants (studies) | Certainty of the evidence (GRADE) |
|---------------------------------------------------|---------------------------------------------------------------------------------------|-----------------------------------------------------------|------------------------------|-----------------------------------|
|                                                   | Risk with usual care                                                                  | Risk with changes in anthropometry                        |                              |                                   |
| Weight (kg) at 12 months                          | The mean weight (kg) at 12 months was 82 kg                                           | MD 0.89 kg lower (2.12 lower to 0.34 higher)              | 3245 (4 RCTs)                | ⊕⊕⊕○ MODERATE <sup>a</sup>        |
| Body mass index (kg/m <sup>2</sup> ) at 12 months | The mean body mass index (kg/m <sup>2</sup> ) at 12 months was 29.6 kg/m <sup>2</sup> | MD 0.79 kg/m <sup>2</sup> lower (1.5 lower to 0.07 lower) | 777 (4 RCTs)                 | ⊕⊕⊕○ MODERATE <sup>b</sup>        |
| Waist circumference (cm) at 6 months              | The mean waist circumference (cm) at 6 months was 98.5 cm                             | MD 0.33 cm lower (4.79 lower to 4.14 higher)              | 109 (2 RCTs)                 | ⊕⊕○○ LOW <sup>a,c</sup>           |

| Outcomes                                  | Anticipated absolute effects* (95% CI)                                   |                                              | № of participants (studies) | Certainty of the evidence (GRADE) |
|-------------------------------------------|--------------------------------------------------------------------------|----------------------------------------------|-----------------------------|-----------------------------------|
|                                           | Risk with usual care                                                     | Risk with changes in anthropometry           |                             |                                   |
| Mean waist circumference (cm) - 12 months | The mean waist circumference (cm) - Waist ratio at 12 months was 99.2 cm | MD 3.47 cm lower (7.61 lower to 0.67 higher) | 148 (3 RCTs)                | ⊕⊕○○<br>LOW <sup>a,c</sup>        |

\*The risk in the intervention group (and its 95% confidence interval) is based on the assumed risk in the comparison group and the relative effect of the intervention (and its 95% CI). CI: Confidence interval; MD: Mean difference. GRADE Working Group grades of evidence: High certainty: We are very confident that the true effect lies close to that of the estimate of the effect; Moderate certainty: We are moderately confident in the effect estimate: The true effect is likely to be close to the estimate of the effect, but there is a possibility that it is substantially different; Low certainty: Our confidence in the effect estimate is limited: The true effect may be substantially different from the estimate of the effect; Very low certainty: We have very little confidence in the effect estimate: The true effect is likely to be substantially different from the estimate of effect. Explanations: <sup>a</sup> Downgraded one level due to differences in studied population. <sup>b</sup> Downgraded one level due to risk of bias assessment. <sup>c</sup> Downgraded one level due to small sample size.

**Figure S1.** Mean energy intake (kcal) at 6 and 12 months.

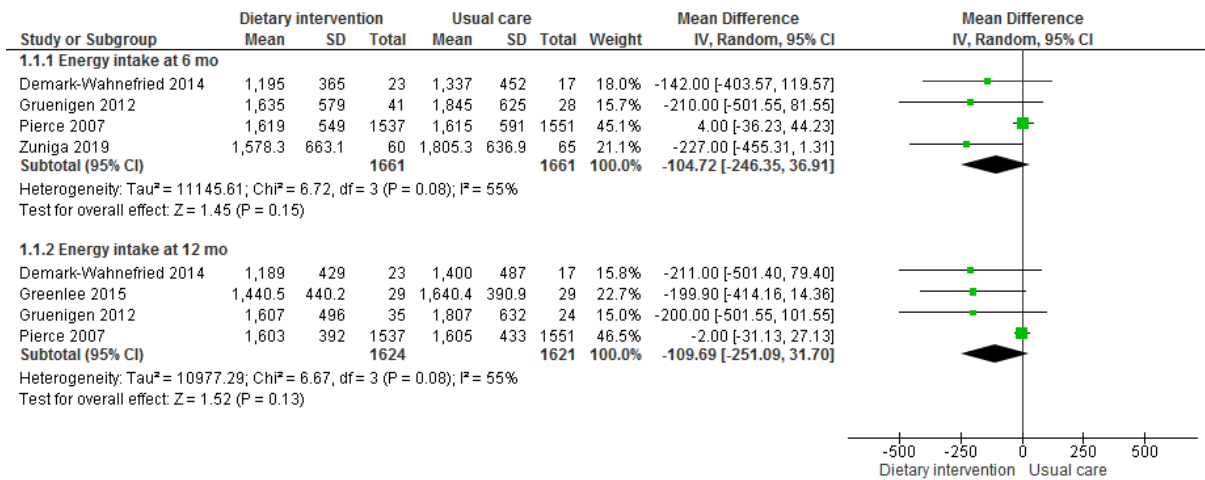

Notes: SD=standard deviation; IV=weighted mean difference; CI=confidence interval; df=degrees of freedom;  $\chi^2$ =chi-square statistic; p=p value;  $I^2$ =I-square heterogeneity statistic; Z=Z statistic

**Figure S2.** Mean fruit intake (servings) at 6 and 12 months.

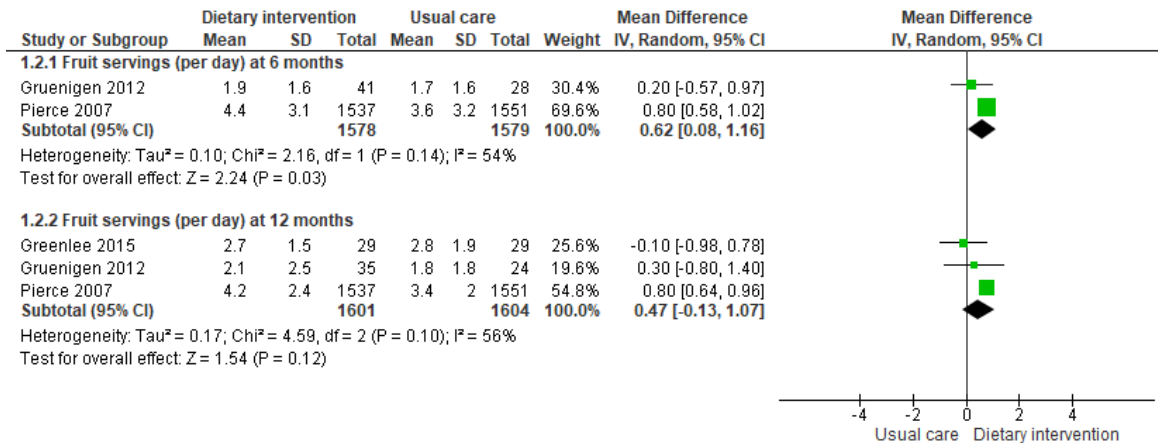

Notes: SD=standard deviation; IV=weighted mean difference; CI=confidence interval; df=degrees of freedom;  $\chi^2$ =chi-square statistic; p=p value;  $I^2$ =I-square heterogeneity statistic; Z=Z statistic

**Figure S3.** Mean vegetable intake (servings) at 6 and 12 months.

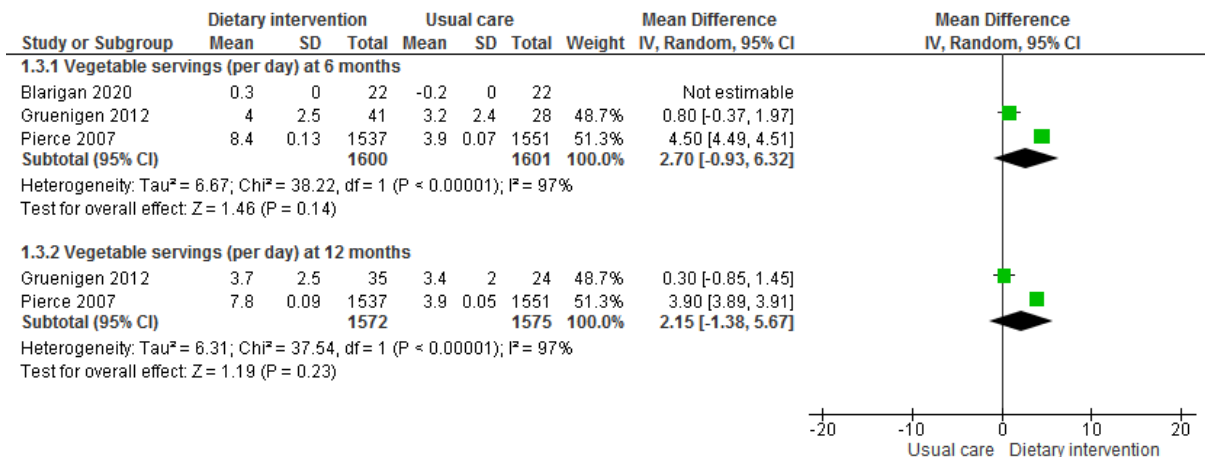

Notes: SD=standard deviation; IV=weighted mean difference; CI=confidence interval; df=degrees of freedom; Chi2=chi-Scheme 2. I-square heterogeneity statistic; Z=Z statistic.

**Figure S4.** Mean fruit and vegetable intake (servings) at 6 and 12 months.

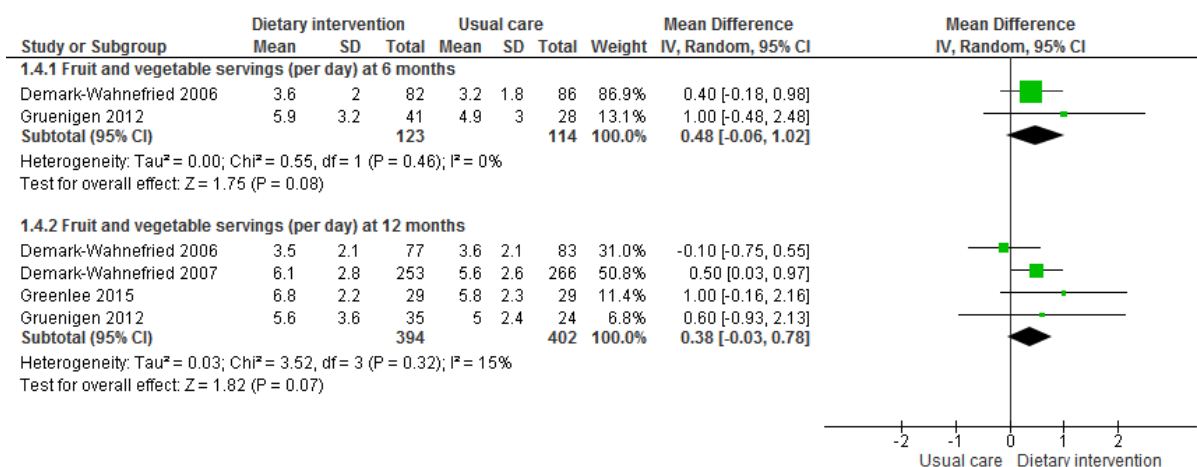

Notes: SD=standard deviation; IV=weighted mean difference; CI=confidence interval; df=degrees of freedom; Chi2=chi-square statistic; p=p value; I2=I-square heterogeneity statistic; Z=Z statistic

**Figure S5.** Mean fibre intake (grams) at 6 and 12 months.

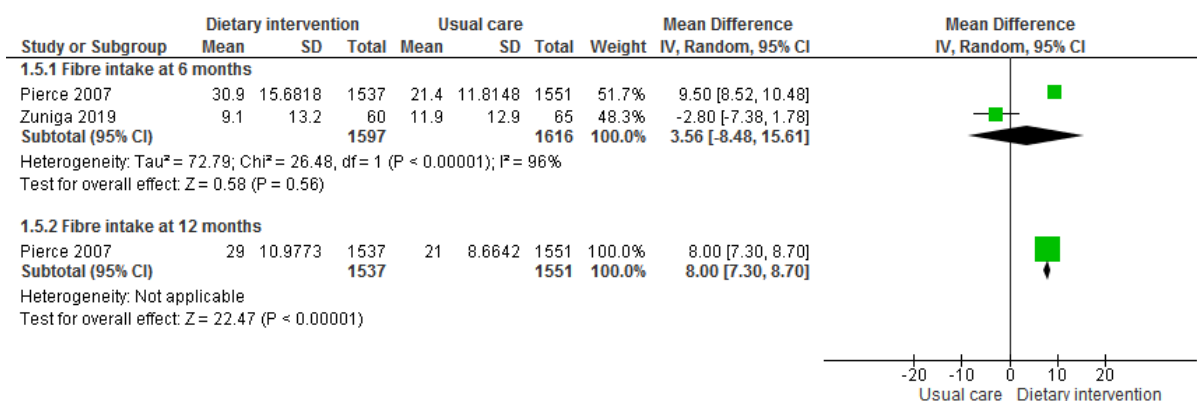

Notes: SD=standard deviation; IV=weighted mean difference; CI=confidence interval; df=degrees of freedom; Chi2=chi-square statistic; p=p value; I2=I-square heterogeneity statistic; Z=Z statistic

**Figure S6.** Diet Quality Index at 6 and 12 months.

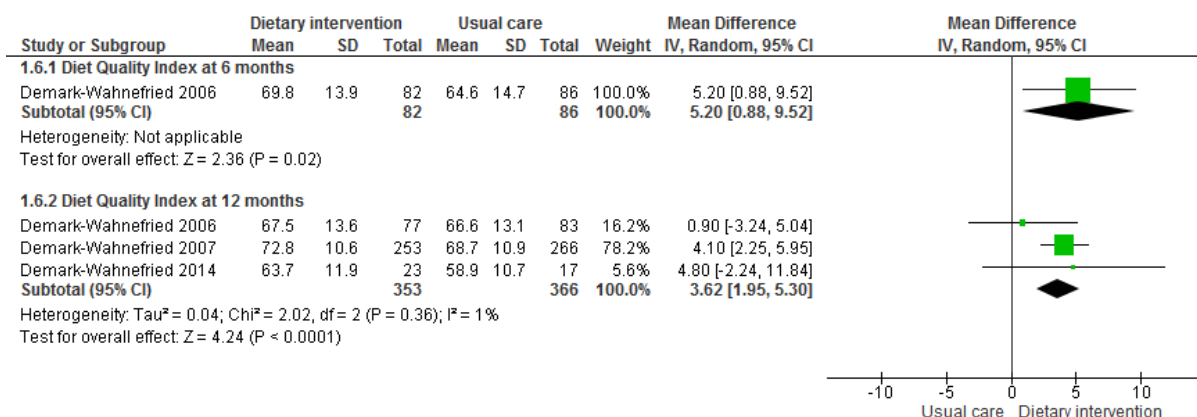

Notes: SD=standard deviation; IV=weighted mean difference; CI=confidence interval; df=degrees of freedom; Chi2=chi-square statistic; p=p value; I2=I-square heterogeneity statistic; Z=Z statistic

**Figure S7.** Mean weight (kg) at 6 and 12 months.

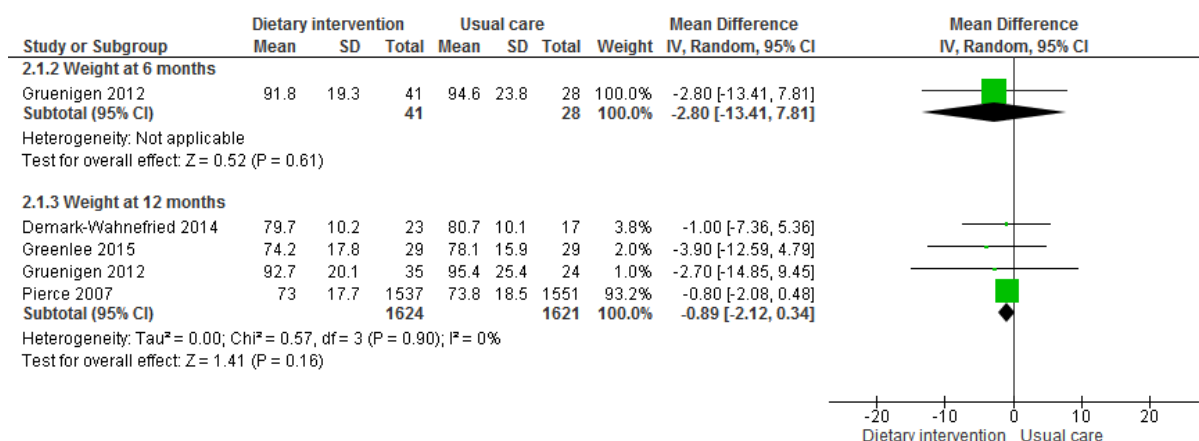

Notes: SD=standard deviation; IV=weighted mean difference; CI=confidence interval; df=degrees of freedom; Chi2=chi-square statistic; p=p value; I2=I-square heterogeneity statistic; Z=Z statistic

**Figure S8.** Mean Body Mass Index (kg/m<sup>2</sup>) at 6 and 12 months.

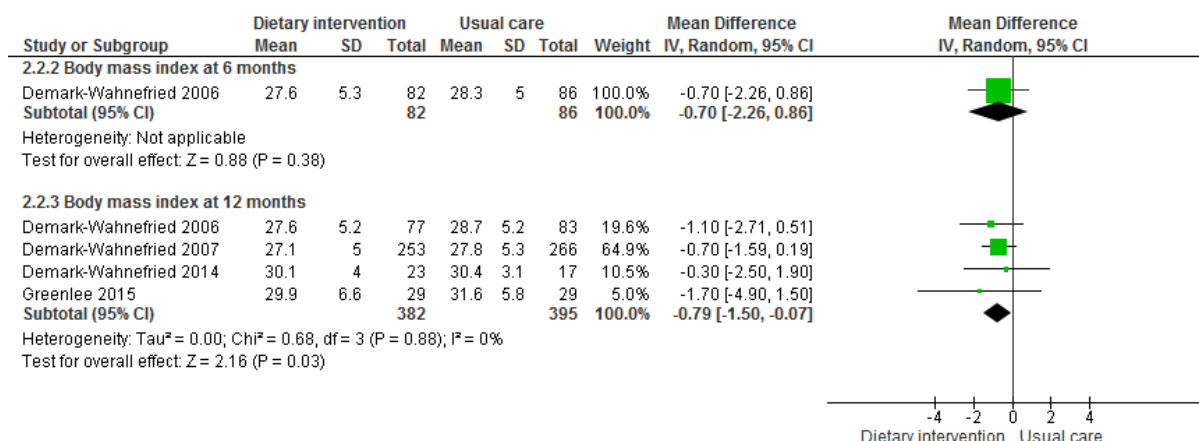

Notes: SD=standard deviation; IV=weighted mean difference; CI=confidence interval; df=degrees of freedom; Chi2=chi-square statistic; p=p value; I2=I-square heterogeneity statistic; Z=Z statistic

**Figure S9.** Mean waist circumference (cm) at 6 and 12 months.

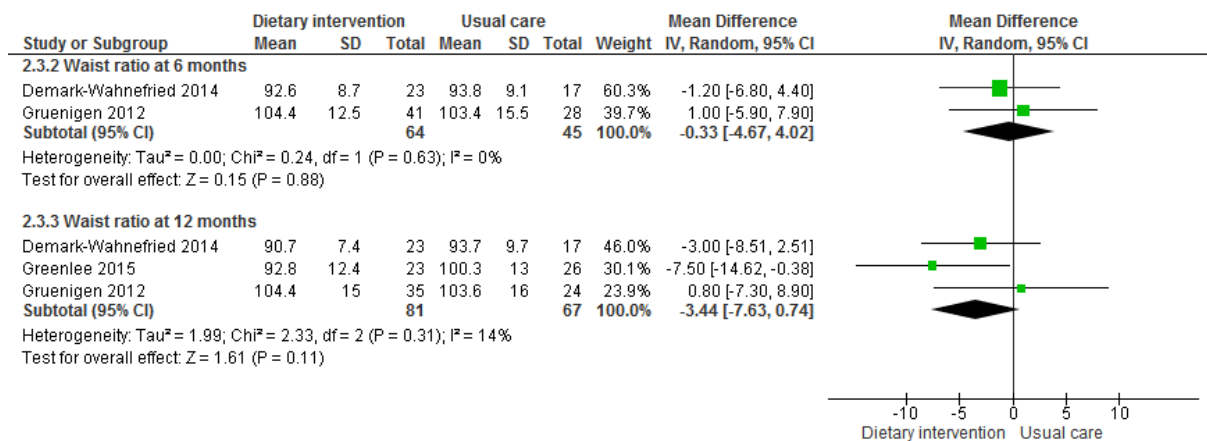

Notes: SD=standard deviation; IV=weighted mean difference; CI=confidence interval; df=degrees of freedom; Chi2=chi-square statistic; p=p value; I2=I-square heterogeneity statistic; Z=Z statistic
